# Supplementary material for: Assessing root-soil interactions in wetland plants: root exudation and radial oxygen loss
Source: Copernicus journal article supplement (doi:10.5194/egusphere-2024-1547), 2024-06-11
Supplement: Supplementary file 1 [file egusphere-2024-1547-supplement.pdf]

## Assessing root-soil interactions in wetland plants: root exudation and radial oxygen loss

Haviland & Noyce, Biogeosciences submission

Supplementary Information

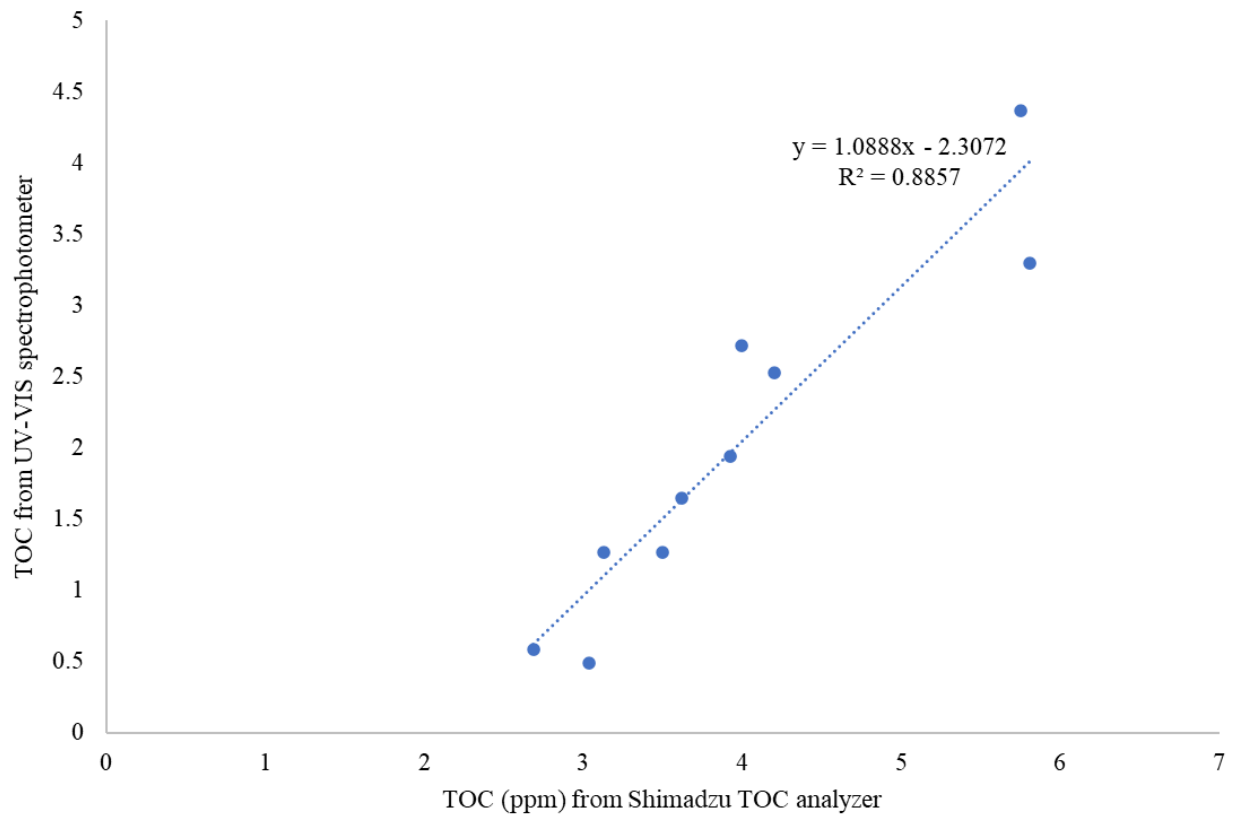

Fig. S1. Results of methods comparison between root exudate TOC measured on a Shimadzu TOC analyzer and a UV-VIS spectrophotometer ( $p < 0.01$ ).

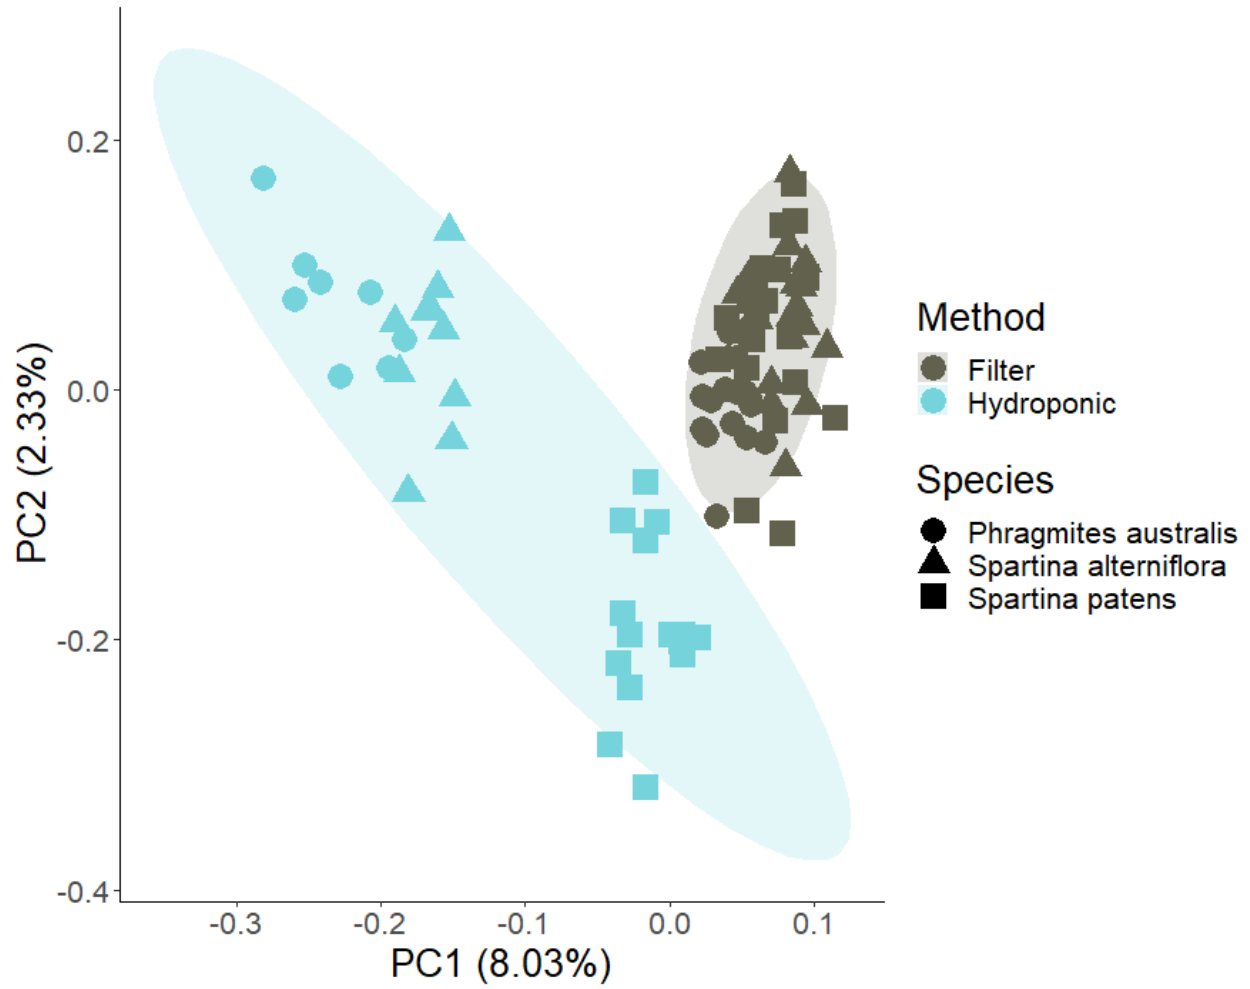

Fig S2. PCA on all identified metabolites assessing methodological comparison between hydroponically collected samples and samples collected using soil filters from 3 species. *S. americanus* is not included due to methodological differences in the filter-collected samples compared to the other 3 species precluding its use in comparisons.

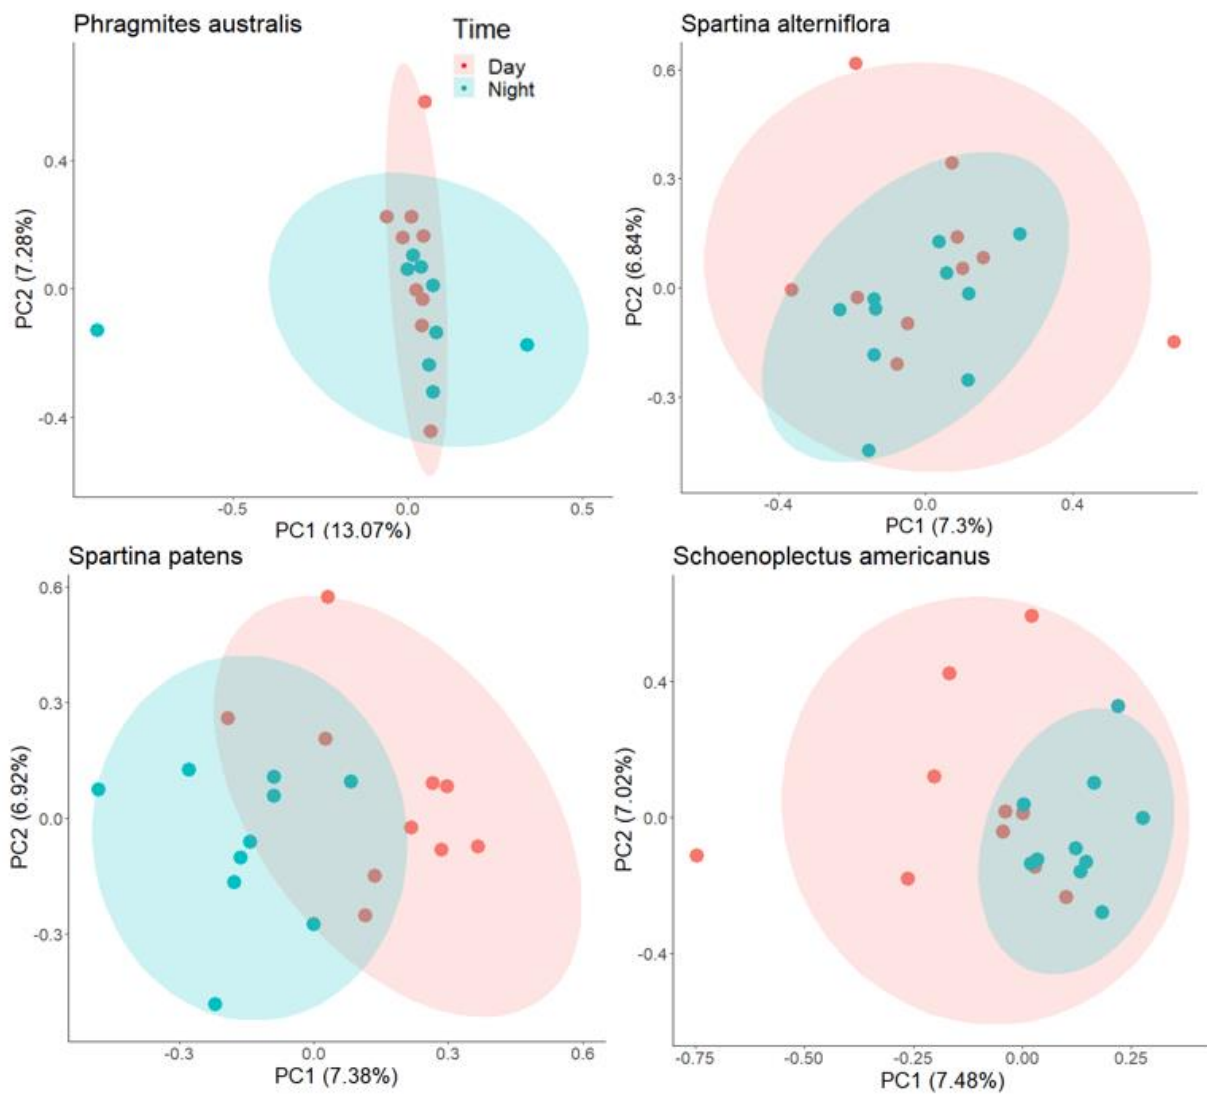

Fig S3. PCAs on all metabolites identified in the light and dark period of 4 species using soil filter collection method. The same root on the same 10 plants was sampled in day and night time. Point size represents relative abundance of all compounds summed.

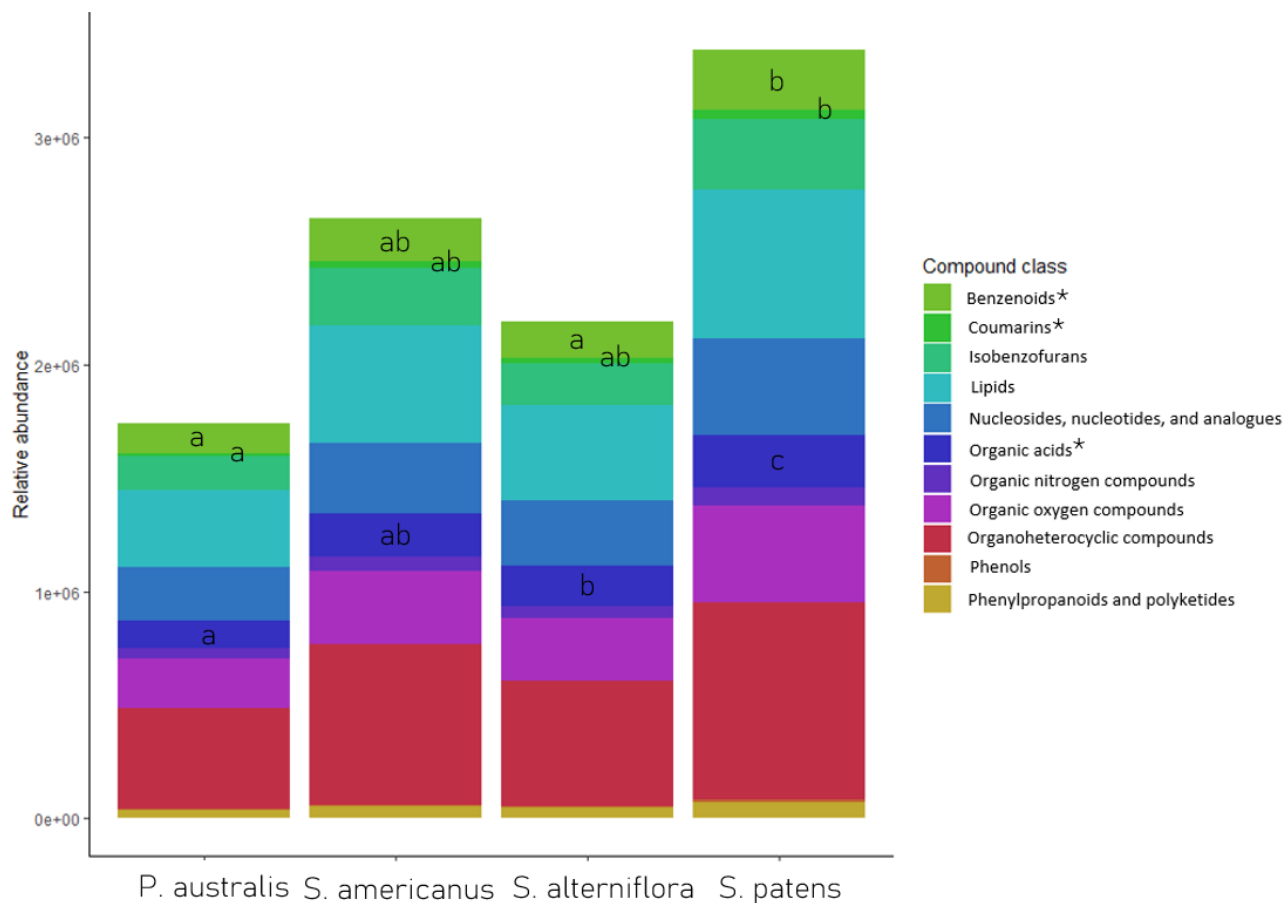

Fig. S4: Average contribution of various compound classes to the overall rhizosphere-associated metabolite pool of each species by relative abundance, using only metabolites previously reported to occur in plants. Relative abundance by compound class was fairly conserved across species, with major differences in compound type scaling to overall relative abundance. There were significant differences ( $p < 0.05$ , Tukey's test) in relative abundance for benzenoids ( $S. patens > S. alterniflora$  and  $P. australis$ ), coumarins ( $S. patens > P. australis$ ), and organic acids ( $S. alterniflora > P. australis$ ;  $S. patens > all$ ).

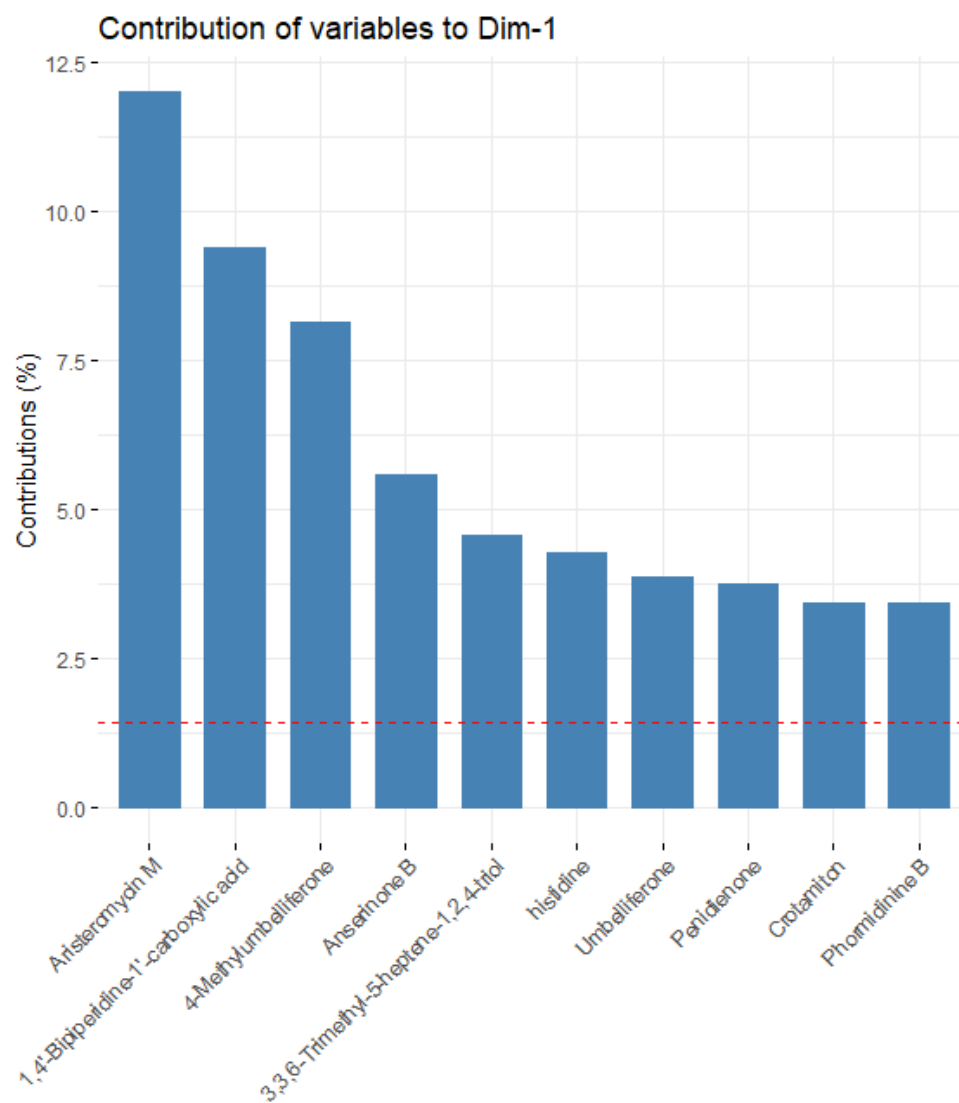

Fig S5. Compounds that differed on a species level (Dimension 1 of PCA).

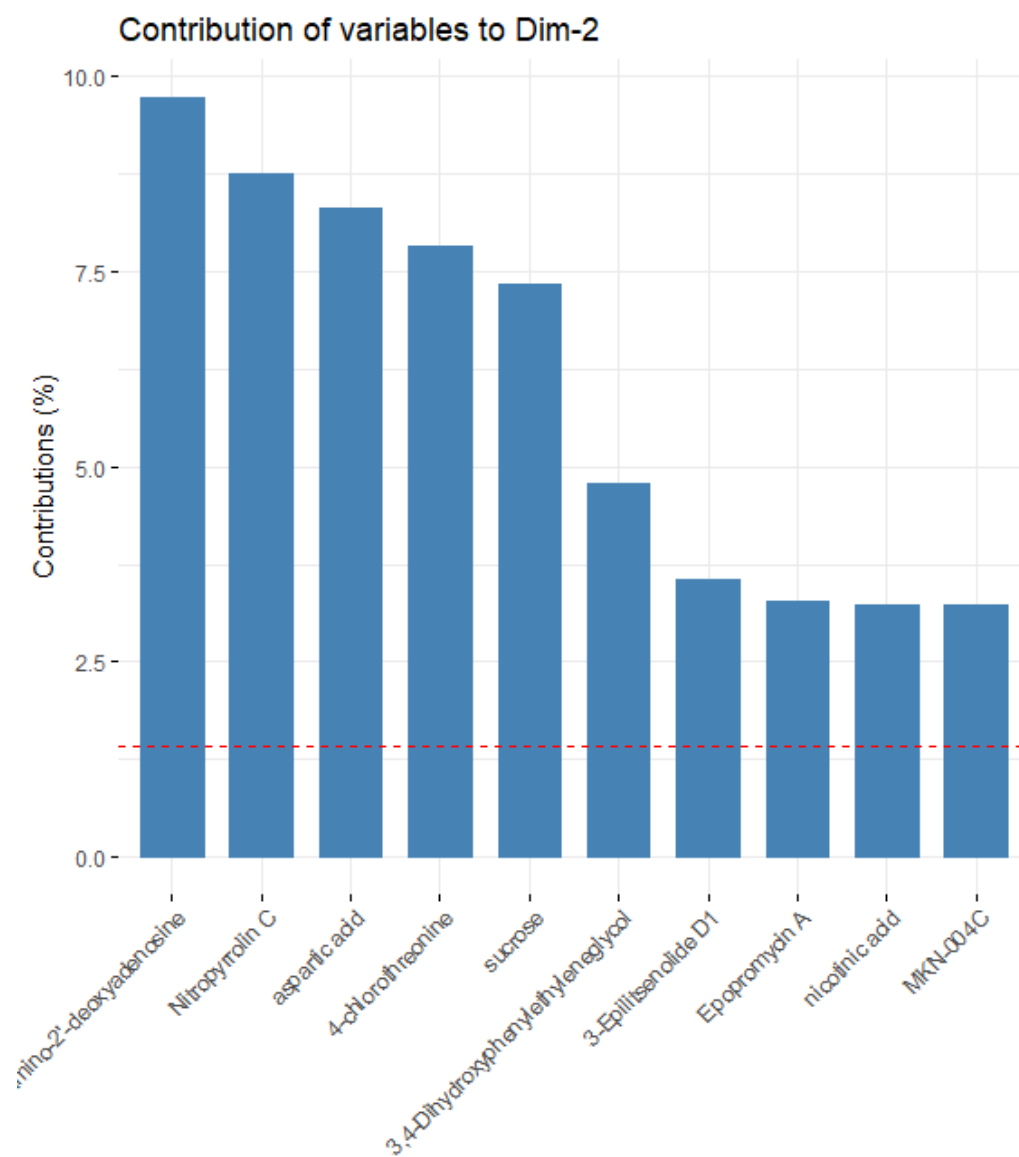

Fig S6. Compounds that differ on a species level (Dimension 2 of PCA).

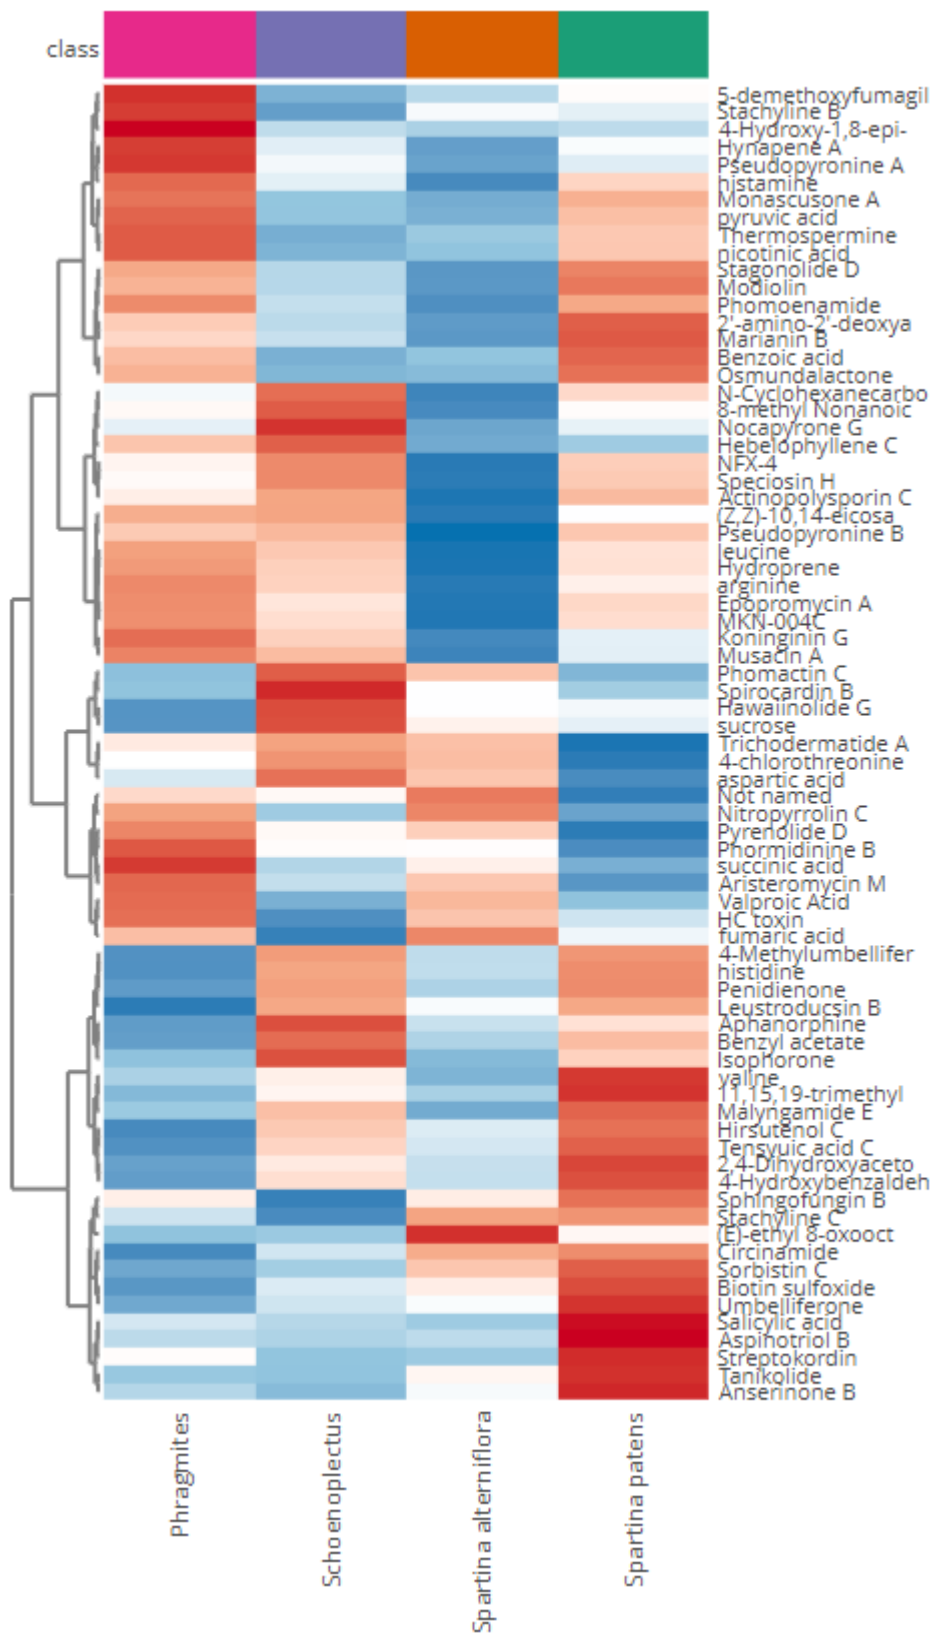

Fig. S7. Relative average abundance of different compounds (only those previously reported as plant metabolites in RMDP) across the 4 species, produced in MetaboAnalyst 6. Blue implies a lower relative abundance, while red implies higher.

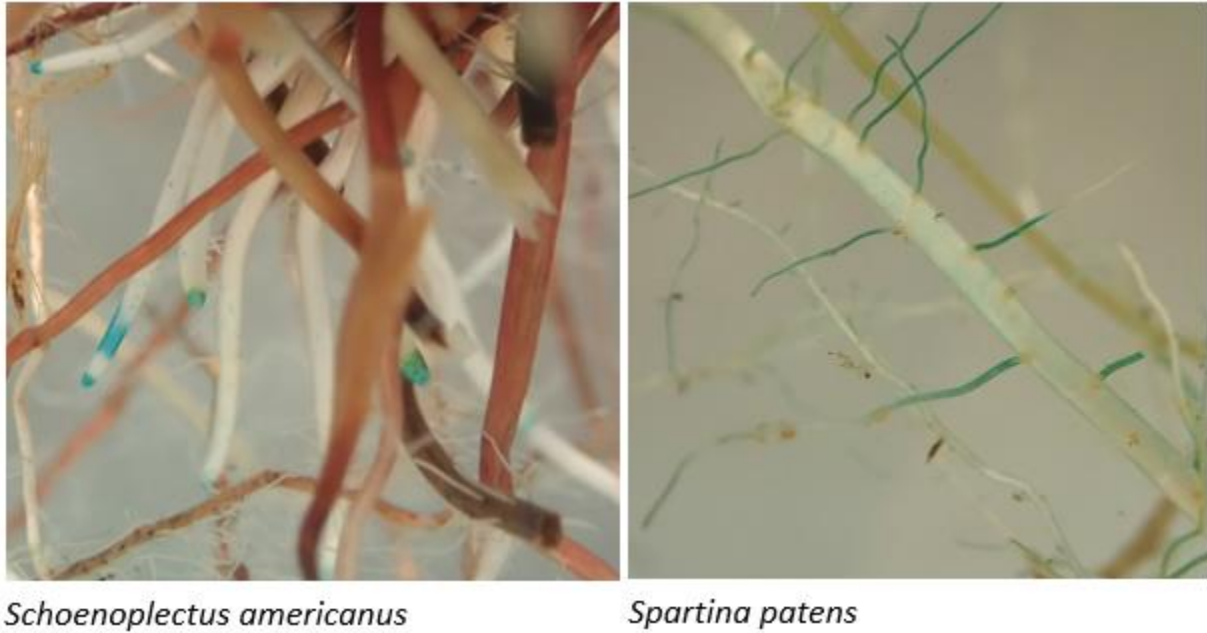

Fig. S8. Typical patterns of oxygenation in the two species demonstrated by methylene blue. Note lack of barrier to ROL in root hairs of *S. patens*, while oxygenated zones in *S. americanus* are limited to the tips of young, adventitious roots.



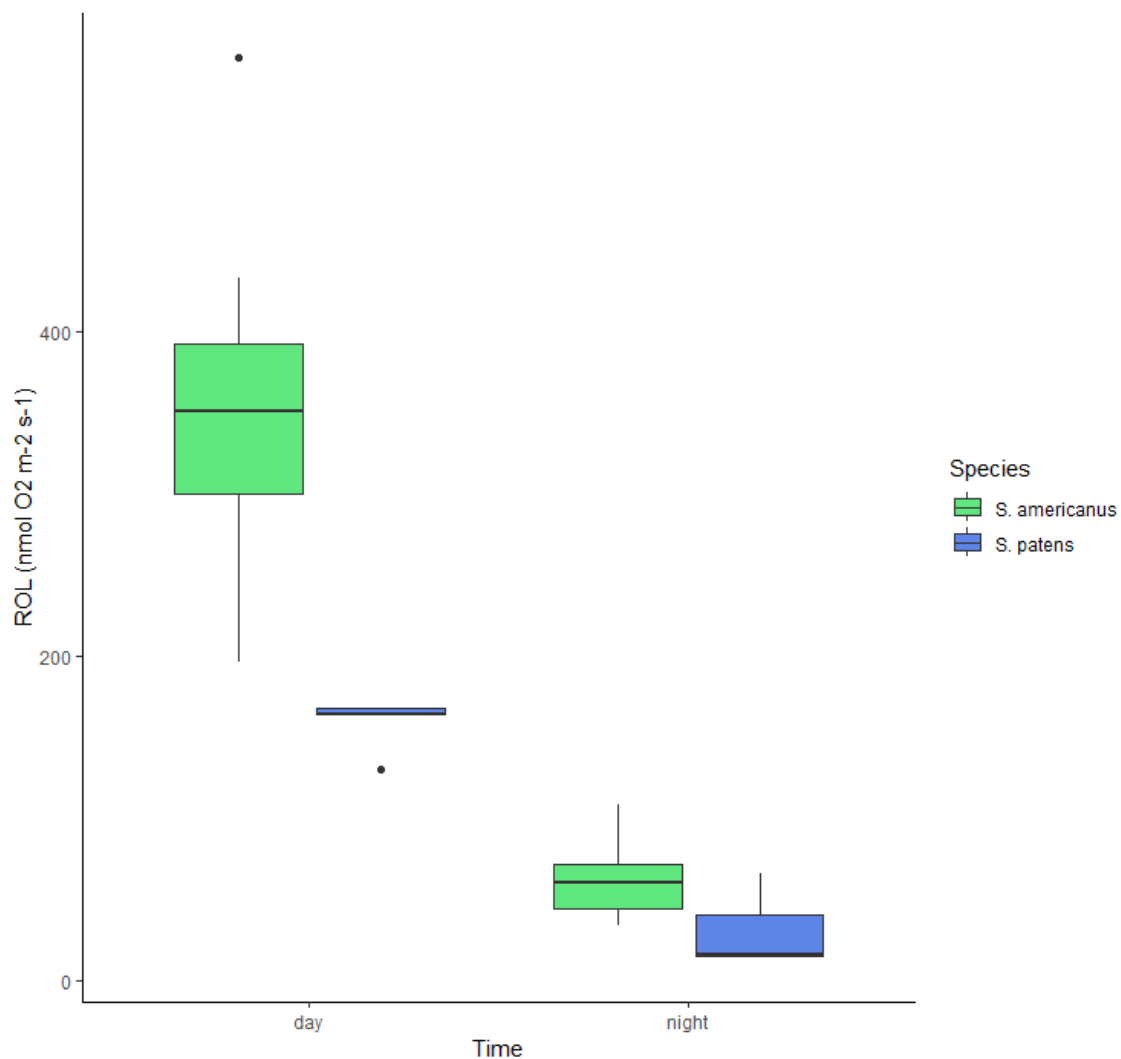

Figure S9. Root oxygen loss rates from *Schoenoplectus americanus* (n = 7) and *Spartina patens* (n = 3) during the day and night periods.

Table S1: A subset of compounds (n = 75) identified using QTOF-MS, of 642 total. Selected based on their matches to compounds previously as plant metabolites in RMDP (<https://www.biosino.org/RefMetaDB/>). Amino acids are shaded in green.

| Compound formula | Compound name    | Greatest abundance, methodology | Greatest abundance, species |
|------------------|------------------|---------------------------------|-----------------------------|
| C22H43NO         | 13Z-Docosenamide | Hydroponic                      | <i>S. americanus</i> *      |
| C9H6O3           | Umbelliferone    | Filter                          | <i>P. australis</i>         |
| C8H8O3           | Vanillin         | Filter                          | <i>P. australis</i>         |

|              |                                       |                     |                         |
|--------------|---------------------------------------|---------------------|-------------------------|
| C10H8O3      | 4-Methylumbelliferone                 | Filter              | <i>S. americanus*</i>   |
| C4H7NO4      | Aspartic acid                         | Hydroponic          | <i>S. americanus*</i>   |
| C5H9N3       | Histamine                             | Virtually identical | <i>S. americanus</i>    |
| C6H13NO2     | Leucine                               | Hydroponic          | <i>S. americanus</i>    |
| C5H11NO2     | Valine                                | Filter              | <i>S. patens</i>        |
| C23H44O2     | 11,15,19-trimethyl-5Z-eicosenoic acid | Filter              | <i>P. australis</i>     |
| C17H30O2     | Hydroprene                            | Filter              | <i>S. americanus</i>    |
| C19H27NO2    | Phormidinine B                        | Hydroponic          | <i>S. americanus</i>    |
| C19H29CIN2O3 | Nitropyrrolin C                       | Hydroponic          | <i>S. alterniflora</i>  |
| C34H56NO10P  | Leustroducsin B                       | Filter              | <i>S. americanus</i>    |
| C13H17NO     | Aphanorphine                          | Filter              | <i>S. americanus</i>    |
| C20H39NO6    | Sphingofungin B                       | Filter              | <i>P. australis</i>     |
| C20H36O3     | 15-HEDE                               | Filter              | <i>P. australis</i>     |
| C20H28O5     | Gibberellin                           | Filter              | <i>S. americanus*</i>   |
| C20H36O2     | 5(Z),14(Z)-Eicosadienoic Acid         | Filter              | <i>S. americanus</i>    |
| C19H14N4O2   | Balantiolide                          | Hydroponic          | <i>S. alterniflora*</i> |
| C10H12O5     | C-veratrolyglycol                     | Hydroponic          | <i>S. alterniflora*</i> |
| C11H14N4O3   | Aristeromycin M                       | Hydroponic*         | <i>S. alterniflora*</i> |
| C6H8O3       | 5-Hydroxymethylfurfuryl alcohol       | Filter              | <i>S. patens</i>        |
| C12H16O3     | Nocapyrone G                          | Virtually identical | <i>S. americanus*</i>   |
| C15H22O4     | Hebelophyllene C                      | Filter              | <i>S. americanus</i>    |
| C9H10O2      | Benzyl acetate                        | Filter              | <i>P. australis</i>     |
| C9H14O       | Isophorone                            | Filter              | <i>S. americanus</i>    |
| C11H20O2     | Speciosin H                           | Filter              | <i>S. americanus</i>    |
| C15H24O3     | 5-demethoxyfumagillol                 | Filter              | <i>S. americanus</i>    |
| C15H22O3     | Hirsutenol C                          | Filter              | <i>P. australis</i>     |

|             |                            |                     |                          |
|-------------|----------------------------|---------------------|--------------------------|
| C20H32O6    | Spirocardin B              | Hydroponic          | <i>S. americanus</i>     |
| C14H24N2O4  | Phomoenamidine             | Hydroponic          | <i>S. patens</i> *       |
| C19H26O3    | Marianin B                 | Filter              | <i>S. patens</i>         |
| C14H18O     | Penidienone                | Virtually identical | <i>S. patens</i>         |
| C20H28O3    | Phomactin C                | Hydroponic          | <i>S. americanus</i> *   |
| C17H30O3    | Pseudopyronine B           | Hydroponic          | <i>S. americanus</i>     |
| C16H30O2    | Actinopolysporin C         | Filter              | <i>S. americanus</i>     |
| C10H14N6O3  | 2'-amino-2'-deoxyadenosine | Filter              | <i>P. australis</i> *    |
| C22H32O7    | Trichodermatide A          | Filter              | <i>S. americanus</i> *   |
| C18H28O5    | Hynapene A                 | Filter              | <i>P. australis</i>      |
| C13H18O5    | Monascusone A              | Filter              | <i>P. australis</i> *    |
| C21H36N2O6  | Epopromycin A              | Hydroponic          | <i>S. americanus</i>     |
| C8H9NO2     | Streptokordin              | Hydroponic          | <i>S. patens</i>         |
| C10H14O4    | Stagonolide D              | Filter              | <i>S. patens</i>         |
| C12H22O3    | NFX-4                      | Filter              | <i>S. americanus</i>     |
| C6H5NO2     | Nicotinic acid             | Hydroponic          | <i>S. patens</i>         |
| C10H16N2O4S | Biotin sulfoxide           | Filter              | <i>S. patens</i>         |
| C12H26N2O9  | Sorbistin C                | Hydroponic          | <i>P. australis</i>      |
| C6H14N4O2   | Arginine                   | Hydroponic          | <i>S. americanus</i>     |
| C10H20O2    | 8-methyl Nonanoic acid     | Hydroponic          | <i>S. americanus</i>     |
| C10H26N4    | Thermospermine             | Hydroponic          | <i>S. americanus</i>     |
| C18H34N4O5  | Circinamide                | Hydroponic          | <i>S. patens</i>         |
| C6H9N3O2    | Histidine                  | Filter              | <i>S. americanus</i>     |
| C8H16O2     | Valproic Acid              | Hydroponic          | <i>S. alterniflora</i>   |
| C12H20O3    | Modiolin                   | Hydroponic          | <i>S. americanus</i>     |
| C10H18O3    | MKN-004C                   | Hydroponic          | <i>S. americanus</i>     |
| C4H8ClNO3   | 4-chlorothreonine          | Hydroponic*         | <i>S. alterniflora</i> * |
| C11H18O6    | Musacin A                  | Filter              | <i>S. americanus</i>     |

|           |                       |            |                          |
|-----------|-----------------------|------------|--------------------------|
| C13H16O4  | Stachyline B          | Hydroponic | <i>S. alterniflora</i>   |
| C16H28O3  | Pseudopyronine A      | Filter     | <i>S. americanus</i>     |
| C16H30O5  | Koninginin G          | Hydroponic | <i>S. americanus</i>     |
| C17H32O3  | Tanikolide            | Filter     | <i>S. americanus</i>     |
| C31H55NO6 | Malyngamide E         | Filter     | <i>P. australis</i> *    |
| C12H22O11 | Sucrose               | Filter*    | <i>P. australis</i> *    |
| C13H18O3  | Stachyline C          | Filter     | <i>P. australis</i>      |
| C11H14O4  | Anserinone B          | Filter     | <i>P. australis</i>      |
| C13H20O6  | Tensyuc acid C        | Hydroponic | <i>S. americanus</i>     |
| C7H6O3    | Salicylic acid        | Filter     | <i>P. australis</i>      |
| C3H4O3    | Pyruvic acid          | Hydroponic | <i>S. patens</i>         |
| C4H6O4    | Succinic acid         | Hydroponic | <i>S. alterniflora</i>   |
| C4H4O4    | Fumaric acid          | Hydroponic | <i>S. alterniflora</i> * |
| C7H6O2    | 4-Hydroxybenzaldehyde | Filter     | <i>P. australis</i> *    |
| C7H6O2    | Benzoic acid          | Filter     | <i>S. patens</i>         |
| C9H16O3   | Aspinotriol B         | Filter     | <i>P. australis</i>      |

Additional methodological details:

Service report from UMBC:

**Summary:** Non-targeted metabolomics analysis was conducted on root exudate samples using LC-MS/MS

**Sample Preparation:** Samples were stored at -20 °C until use. Prior to analysis, samples were thawed at 4 °C and vortexed for homogeneity. A 1 mL aliquot of each sample was transferred to separate 2 mL autosampler vials and loaded in the HPLC autosampler.

**Data Acquisition:** Analysis was performed using the Bruker compact Q-TOF-MS equipped with a Dionex UltiMate 3000 UHPLC with a Waters Acquity BEH C18 (1.7 µm, 2.1x50 mm) column. 2 µL of sample was injected onto the column and eluted by the following gradient (A: Water with 0.1% formic acid; B: Acetonitrile with 0.1% formic acid). Flow was held at 2% B for 1 min before increasing to 98% B over a period of 4 min. This was held for 3 min before decreasing to 2% B over 0.1 min, and holding at 2% B for 1.9 min. Flow rate was constant at 0.3 mL/min and column oven was held at 40 °C. The autosampler was chilled to 4 °C. The LC method was saved as “Metabolomics\_Acquity”.

Tuning and mass calibration of the mass spectrometer was performed prior to running samples, using 10 mM sodium formate at a flow rate of 3 µL/min. Each sample was run in both positive and negative ionization modes. For positive ion mode, MS/MS data were collected over the mass range of 20-1300 m/z in auto MS/MS mode. For intra-run calibration, 20 µL of sodium formate was injected in the first 0.3 min of the run. The capillary voltage was set at 4500 V with a nebulizer gas flow of 2.2 Bar, dry gas of 10.0 L/min, dry temperature of 220 °C, and collision energy of 20-50 eV. Negative ion mode, MS/MS data was collected with identical conditions, except the capillary voltage was set to -3600 V. MS methods were saved as “Metabolomics\_autoMSMS\_pos\_V2” and “Metabolomics\_autoMSMS\_neg\_V2”.

**Data Analysis:** MetaboScape 2023b software (Bruker) was used for processing and analyzing the MS/MS data. The following parameters for molecular feature identification and ‘bucketing’ were set in the T-ReX 2D/3D workflow: for peak detection, a minimum intensity threshold of 1000 counts was required, as well as a minimum peak duration of 7 spectra, with feature quantitation determined using peak intensity. Masses were recalibrated based on the external calibrant (sodium formate) injected between 0-0.3 min. Only features found in at least 90% of samples per sample group were considered.

Features were identified by MetaboScape by matching against the Natural Product Atlas, Cell Culture Nutrients, Fatty Acids, and Bruker MetaboBASE Plant Library target lists, as well as by MSMS spectral matching against the NIST 2020 MSMS Library. All analysis results are listed the Supplementary File “KHaviland\_Dec2023.xlsx”.
